# Supplementary material
Source: PubMed Central journal article supplement (PMC3814175)
Supplement: NIHMS520480-supplement-Supplement.pdf [file NIHMS520480-supplement-Supplement.pdf]

## Supplementary Appendix

This appendix has been provided by the authors to give readers additional information about their work.

Supplement to: Lee M, Lee J, Carroll MW, et al. Linezolid for treatment of chronic extensively drug-resistant tuberculosis. *N Engl J Med* 2012;367:1508-18. DOI: 10.1056/NEJMoa1201964

**Linezolid (Zyvox™) for the Treatment of  
Chronic Extensively Drug-Resistant Tuberculosis**

**Supplementary Appendix**

**Table of Contents**

|                                                                                                                                                               |         |
|---------------------------------------------------------------------------------------------------------------------------------------------------------------|---------|
| Supplemental Material 1: Inclusion and Exclusion Criteria                                                                                                     | Page 2  |
| Supplemental Table 1: Initial regimen and current/final regimen                                                                                               | Page 5  |
| Supplemental Figure 1: Study timeline (Immediate arm)                                                                                                         | Page 8  |
| Supplemental Figure 2: Study timeline (Delayed arm)                                                                                                           | Page 9  |
| Supplemental Table 2: All clinically significant adverse* events regardless of relationship to linezolid and number reported as serious adverse events (SAEs) | Page 10 |
| Supplemental Figure 3: Kaplan-Meier survival curves of type of adverse event and time since 2 <sup>nd</sup> randomization, stratified by treatment arm        | Page 11 |
| Supplemental Table 3: Frequency of clinically significant adverse events possibly or probably related to linezolid                                            | Page 12 |
| Supplemental Table 4: Linezolid stoppage and dose adjustments                                                                                                 | Page 13 |
| Supplemental Figure 4: Current status of study subjects                                                                                                       | Page 15 |
| Supplemental Material 2: Subjective Peripheral Neuropathy Score (SPNS)                                                                                        | Page 16 |

## Supplemental Material 1: Inclusion and Exclusion Criteria

### (1) Inclusion criteria

- 1) Males and females age 20 and above
- 2) Documented pulmonary tuberculosis at screening
- 3) Radiographic evidence of tuberculous disease of the lung(s)
- 4) History of chronic, AFB positive sputum smears and culture positive TB
- 5) Mycobacterium species identification as *Mycobacterium tuberculosis*
- 6) Confirmed resistance to INH, RIF, kanamycin, ofloxacin, and moxifloxacin by genotypic or phenotypic testing OR subjects with documented failure to respond to treatment despite DST susceptibility
- 7) Failure to respond (after at least 6 months) to an anti-TB drug regimen including any known active agents
- 8) Willingness to be an inpatient at NMTH until 2 consecutive AFB-negative sputum smears
- 9) When an outpatient, willing to come back for weekly tests and scheduled follow-up visits
- 10) Willingness to have samples stored
- 11) Ability and willingness to give written or oral informed consent

### (2) Exclusion criteria

- 1) Subjects below 20 years of age
- 2) Subjects who have previously been on LZD
- 3) Women of childbearing potential, who are pregnant, breast feeding, or unwilling to avoid pregnancy (*i.e.*, the use of appropriate contraception including oral and subcutaneous implantable hormonal contraceptives, condoms, diaphragm, intrauterine

device (IUD), or abstinence from sexual intercourse) [Note: Prospective female participants of childbearing potential must have negative pregnancy test (urine) within 48 hours prior to study entry.]

- 4) Men who are unwilling to use contraceptives or practice abstinence
- 5) People with any of the following in their current medical assessments:
  - a. Absolute neutrophil count < 1000 cells/mL
  - b. White blood cell count (WBC) <  $3.0 \times 10^3/\mu\text{L}$
  - c. Hemoglobin < 7.0 g/dL
  - d. Platelet count < 75,000 cells/mm<sup>3</sup>
  - e. Serum creatinine > 2.0 mg/dL
  - f. Aspartate aminotransferase (AST or SGOT) >100 IU/L
  - g. Alanine aminotransferase (ALT or SGPT) >100 IU/L
  - h. Total bilirubin > 2.0 mg/dL
  - i. Moderate or severe peripheral or optical neuropathy (or a history of)
  - j. HIV-1 or HIV-2 infection
  - k. Systemic lupus erythematosus, rheumatoid arthritis, or other connective tissue disease
- 6) Patients who, in the investigator's judgment, are too ill to participate in the study
- 7) History of allergy or serious adverse reaction to the LZD formulation used in this study
- 8) Patients with anticipated surgical intervention
- 9) The use of any of the following drugs within 30 days prior to study or anticipated use of these drugs within the next 60 days: (Please note, bronchodilators and cough syrup (or similar cough medicines) are allowed before and during the study if blood pressure is monitored regularly, per Contraindications, p.12, of the Zyvox Package Insert.)
  - a. Selective serotonin reuptake inhibitors (SSRIs)
  - b. Monoamine oxidase inhibitors (MAOIs)

- c. Sympathomimetic agents (e.g. pseudoephedrine)
  - d. Vasopressive agents (e.g. epinephrine, norepinephrine)
  - e. Systemic cancer chemotherapy
  - f. Systemic corticosteroids
  - g. Systemic investigational agents
  - h. Antiretroviral medications
  - i. Growth factors
  - j. HIV vaccines
  - k. Immune globulin
  - l. Interleukins
  - m. Interferons
- 10) The need for ongoing therapy with antidepressants (SSRI, MAOI), hydroxyzine, dopaminergic agents (such as Sinemet, dopamine, and dobutamine), lithium, cyclosporine, tacrolimus, sirolimus, and levodopa (such as sinemet) while on study drug.
- 11) Any other serious systemic illness including uncontrolled hypertension requiring treatment and/or hospitalization until subject either completes therapy or is clinically stable on therapy for at least 14 days prior to study entry.
- 12) Patients who the physician has reason to believe may have been non-compliant in the previous 12 months of treatment.

**Supplemental Table 1: Initial regimen, final regimen, susceptible drugs at entry\*, Treatment status and follow up**

| Subject ID | Entry regimen             | Current/Final regimen | Susceptible drugs at entry | Treatment outcome†/status, study status and follow up                                      |
|------------|---------------------------|-----------------------|----------------------------|--------------------------------------------------------------------------------------------|
| 1          | H,R                       | R,Mfx,Clr             | Cs, S, Mfx                 | Cure, completed study without relapse                                                      |
| 2          | Z,Cs,Mfx                  | Cs,Mfx,Clr,Amx/Clv    | None                       | Cure, withdrew after end of therapy (EOT) plus 6 months without relapse                    |
| 3          | H,Pto,Cs,Lfx              | Na‡                   | Cs                         | Withdrawn due to SAE (anemia) before culture conversion to negative                        |
| 4          | H,Lfx                     | Mfx,Clr,Amx/Clv       | None                       | Cure, completed study without relapse                                                      |
| 5          | H,E,Cs,Mfx,Clr            | E,Mfx                 | Z,PAS, S                   | Cure, lost to follow-up after EOT                                                          |
| 6          | Pto,Cs,PAS,Clr,Amx/Clv,Km | Cs,Mfx,Clr,Amx/Clv    | Cs,Km,Cm,Am                | Cure, lost to follow-up after EOT                                                          |
| 7          | H,R,Lfx                   | Na                    | Pto,Cs,S,Km,Cm,Am,Rb       | Withdrawn prior to receiving study drug after being diagnosed with metastatic colon cancer |
| 8          | Pto,Mfx,PAS,Clr,Rb        | Pto,Cs,Mfx,PAS,Clr,Km | Cs,Km,Cm,Am,Rb             | Cure, awaiting EOT plus 6 month without relapse                                            |
| 9          | H,R                       | Mfx,Clr,Amx/Clv       | Pto,Mfx,PAS,S,Cm,Rb        | Cure, awaiting EOT plus 12 month without relapse                                           |
| 10         | Pto,Cs,Lfx,PAS            | Pto,Mfx,Clr,Amx/Clv   | None                       | Treatment failure, never converted sputum culture to negative                              |
| 11         | R,Z,Mfx,PAS               | Z,Mfx,Amx/Clv,Am      | Pto,PAS,Km,Cm,Am           | Withdrawn due to AE (optic neuropathy) after becoming culture negative                     |

|    |                           |                      |                             |                                                                                                                   |
|----|---------------------------|----------------------|-----------------------------|-------------------------------------------------------------------------------------------------------------------|
| 12 | H                         | H,Clr,Amx/Clv        | E,Cs                        | Treatment Failure. Initially converted sputum culture to negative but reverted to positive after primary endpoint |
| 13 | Pto,Cs,Lfx,Clr            | Am                   | Km,Cm,Am                    | On therapy, culture negative                                                                                      |
| 14 | Pto,Cs,Mfx,Clr,Amx/Clv,Rb | Cs,Mfx,Clr,Amx/Clv,S | E,S,Rb                      | On therapy, culture negative                                                                                      |
| 15 | Pto,Cs,Lfx                | Na                   | Z,PAS,Km,Cm,Am              | Treatment failure, never converted sputum culture to negative                                                     |
| 16 | H,R,Z,Pto,Cs,Mfx          | Mfx,Clr,Amx/Clv,Am   | Km,Am                       | On therapy, culture negative                                                                                      |
| 17 | Z,Pto,Cs,Mfx,PAS,Km       | Z,Mfx,Clr,Amx/Clv,Km | PAS                         | On therapy, culture negative                                                                                      |
| 18 | Z,Pto,Cs,Mfx,Rb           | Clr,Amx/Clv,S        | Z,Lfx,Mfx,PAS,S             | On therapy, culture negative                                                                                      |
| 19 | E,Cs,Lfx                  | Mfx,Clr,Amx/Clv,Am   | Z,Mfx,PAS,Km,Cm,Am          | On therapy, culture negative                                                                                      |
| 20 | None                      | Mfx,Clr,Amx/Clv,Am   | Mfx,PAS,Km,Cm,Am            | Withdrawn before EOT for personal reasons                                                                         |
| 21 | Cs,Lfx,PAS,Clr,S          | Lfx,PAS,Clr,S        | Z,Ofx,Lfx,Mfx,S,Km,Cm,Am,Rb | On therapy, culture negative                                                                                      |
| 22 | E,Z,Cs,Mfx                | Cs,Mfx,Clr,Amx/Clv,S | S                           | On therapy, culture negative                                                                                      |
| 23 | Pto,Cs,Lfx                | Mfx,Clr,Amx/Clv,Am   | Pto,Km,Cm,Am                | On therapy, culture negative                                                                                      |
| 24 | Z,Cs,Mfx,Clr,Rb           | Na                   | Mfx,PAS,S,Km,Cm,Am          | On therapy, culture negative                                                                                      |
| 25 | Z,Pto,Cs,Lfx,Rb           | Mfx,Clr,Amx/Clv,Km   | Rb                          | On therapy, culture negative                                                                                      |
| 26 | H,R                       | R,Clr,Amx/Clv,S      | S                           | Cure, completed study without relapse                                                                             |
| 27 | Mfx,Clr                   | Mfx,Clr,S            | Cs,Mfx,PAS,S                | Cure, lost to follow-up after EOT plus 6 month without relapse                                                    |

|    |                       |                        |                             |                                                                                                                                      |
|----|-----------------------|------------------------|-----------------------------|--------------------------------------------------------------------------------------------------------------------------------------|
| 28 | Z,Pto,Cs,Clr,Amx/Clv  | Pto,Cs,Mfx,Clr,Amx/Clv | E,Mfx,S,Km,Am               | Cure, awaiting EOT plus 12 month without relapse                                                                                     |
| 29 | Pto,Cs,Mfx            | Pto,Cs,Mfx,Amx/Clv,S   | PAS,S                       | Cure, awaiting EOT plus 6 month without relapse                                                                                      |
| 30 | Pto,Cs,Lfx,PAS,Clr,S  | H,Mfx,Clr,Amx/Clv,Am   | Km,Cm,Am                    | Cure, awaiting EOT plus 6 month without relapse                                                                                      |
| 31 | Pto,Cs,Mfx,PAS        | Cs,Mfx,PAS             | Z,Cs,PAS,Km,Cm,Am           | Cure, awaiting EOT plus 6 month without relapse                                                                                      |
| 32 | H,E,Z,Mfx,Clr         | E,Mfx,Clr,Amx/Clv,Km   | E,Lfx,Mfx,PAS,S,Km,Cm,Am,Rb | On therapy, culture negative                                                                                                         |
| 33 | E,Pto,Cs,Lfx,PAS      | Amx/Clv,Am             | E,Km,Cm,Am,Rb               | On therapy, culture negative                                                                                                         |
| 34 | Z,Pto,Cs,PAS,Rb       | Z,Clr,Amx/Clv,Am       | Km,Cm,Am                    | Withdrawn due to AE (optic neuropathy); initially became culture negative on LZD but reverted after discontinuation of LZD due to AE |
| 35 | Z,Mfx,PAS,Clr,Amx/Clv | No change              | Cs,Lfx,PAS,Cm,Am,Rb         | On therapy, culture negative                                                                                                         |
| 36 | None                  | Z,Mfx,PAS,Clr,Am       | H,Cs,PAS,Cm,Am              | On therapy, culture negative                                                                                                         |
| 37 | Pto,Cs                | Z,Mfx,Clr,Amx/Clv,Km   | E,S,Km,Cm,Am                | On therapy, culture negative                                                                                                         |
| 38 | E,Pto,Mfx,Rb          | Na                     | PAS,Km,Cm,Am,Rb             | Treatment failure, never converted sputum culture to negative                                                                        |
| 39 | H,Pto,Lfx             | Pto,Mfx,Clr,Amx/Clv,S  | E,PAS,S,Rb                  | On therapy, culture negative                                                                                                         |

\* Abbreviation of drugs as following: isoniazid (H), rifampicin (R), ethambutol (E), pyrazinamide (Z), prothionamide (Pto), cycloserine (Cs), ofloxacin (Ofx), levofloxacin (Lfx), moxifloxacin (Mfx), p- aminosalicylic acid (PAS), clarithromycin (Clr), amoxicillin/clavulanate (Amx/Clv), streptomycin (S), kanamycin (Km), amikacin (Am) capreomycin (Cm), rifabutin (Rb), linezolid(Lzd)

† Status as of May 1, 2012. Cure and treatment failures were defined using WHO criteria.



**Supplemental Figure 1: Study timeline (Immediate arm)**

| Evaluation                     | Screening                                                                                                | Entry | 1w | 2w | 3w | 4w | 5w | 6w | 7w | 8w | 9w | 10w | 11w | 12w | 13w | 14w | 15w | 16w | 5m | 6m | 7m | Every 2month | EOT | EOT +6m | EOT+ 12m | Early withdraw |
|--------------------------------|----------------------------------------------------------------------------------------------------------|-------|----|----|----|----|----|----|----|----|----|-----|-----|-----|-----|-----|-----|-----|----|----|----|--------------|-----|---------|----------|----------------|
| Clinical examination           | ○                                                                                                        | ○     |    |    |    | ○  |    |    |    |    |    |     |     | ○   |     |     |     | ○   | ○  | ○  | ○  | ○            | ○   | ○       | ○        | ○              |
| Medical history                | ○                                                                                                        |       |    |    |    |    |    |    |    |    |    |     |     |     |     |     |     |     |    |    |    |              |     |         |          |                |
| HIV ELISA                      | ○                                                                                                        |       |    |    |    |    |    |    |    |    |    |     |     |     |     |     |     |     |    |    |    |              |     |         |          |                |
| AFB smear                      |                                                                                                          | ○     | ○  | ○  | ○  | ○  | ○  | ○  | ○  | ○  | ○  | ○   | ○   | ○   | ○   | ○   | ○   | ○   | ○  | ○  | ○  | ○            | ○   | ○       | ○        | ○              |
| TB culture                     |                                                                                                          | ○     | ○  | ○  | ○  | ○  | ○  | ○  | ○  | ○  | ○  | ○   | ○   | ○   | ○   | ○   | ○   | ○   | ○  | ○  | ○  | ○            | ○   | ○       | ○        | ○              |
| DST                            | ○                                                                                                        |       |    |    |    |    |    |    |    |    |    |     |     |     |     |     |     |     |    |    |    |              |     |         |          |                |
| Radiologic imaging             | CT or PET/CT scan was performed according to the randomized arm and participation of substudy for PET/CT |       |    |    |    |    |    |    |    |    |    |     |     |     |     |     |     |     |    |    |    |              |     |         |          |                |
| Chemistries                    | ○                                                                                                        | ○     | ○  | ○  | ○  | ○  | ○  | ○  | ○  | ○  | ○  | ○   | ○   | ○   | ○   | ○   | ○   | ○   | ○  | ○  | ○  | ○            | ○   | ○       | ○        | ○              |
| Hematology                     | ○                                                                                                        | ○     | ○  | ○  | ○  | ○  | ○  | ○  | ○  | ○  | ○  | ○   | ○   | ○   | ○   | ○   | ○   | ○   | ○  | ○  | ○  | ○            | ○   | ○       | ○        | ○              |
| PK (blood/sputum)              |                                                                                                          | ○     |    | ○  | ○  | ○  | ○  |    |    |    |    |     |     |     | ○   | ○   | ○   | ○   |    |    |    |              |     |         |          | ○              |
| MTB lipid (urine/blood/sputum) |                                                                                                          | ○     | ○  |    | ○  |    | ○  |    | ○  |    | ○  |     | ○   |     | ○   |     | ○   |     | ○  |    |    |              |     |         |          |                |
| T-SPOT-TB                      |                                                                                                          | ○     | ○  |    | ○  |    | ○  |    | ○  |    | ○  |     | ○   |     |     |     | ○   |     |    |    | ○  |              |     |         |          |                |
| Whole blood killing assay      |                                                                                                          | ○     |    |    | ○  |    |    |    | ○  |    |    |     |     |     |     |     |     |     |    |    |    |              |     |         |          | ○              |
| Mitochondrial Assay            |                                                                                                          | ○     |    |    | ○  |    | ○  |    | ○  |    | ○  |     | ○   |     | ○   |     | ○   |     | ○  | ○  | ○  | ○            | ○   |         |          | ○              |
| TB RNA                         |                                                                                                          | ○     | ○  | ○  |    | ○  |    |    |    |    |    |     |     |     |     |     |     |     |    |    |    |              |     |         |          |                |
| Neurologic examination         | ○                                                                                                        |       |    |    |    | ○  |    |    |    | ○  |    |     |     | ○   |     |     |     | ○   | ○  | ○  | ○  | ○            | ○   | ○       | ○        | ○              |
| Optic test                     |                                                                                                          | ○     |    |    |    | ○  |    |    |    | ○  |    |     |     | ○   |     |     |     | ○   | ○  | ○  | ○  | ○            | ○   | ○       | ○        | ○              |
| Pregnancy test                 | ○                                                                                                        |       |    |    |    |    |    |    |    | ○  |    |     |     |     |     |     |     |     |    | ○  |    |              |     |         | ○        | ○              |



**Supplemental Table 2: All clinically significant adverse\* events regardless of relationship to linezolid and number reported as serious adverse events (SAEs)†**

| Event                 | Total     | Reported as SAE |
|-----------------------|-----------|-----------------|
| Peripheral neuropathy | 21        | 6               |
| Myelosuppression      | 7         | 7               |
| Optic Neuropathy      | 7         | 7               |
| Hepatic dysfunction   | 4         | 3               |
| Hyperglycemia         | 3         | 0               |
| Pneumonia             | 3         | 3               |
| Uric acid elevation   | 2         | 0               |
| Rhabdomyolysis        | 2         | 2               |
| Other †               | 7         | 5               |
| <b>Total</b>          | <b>56</b> | <b>33</b>       |

\*Clinically significant adverse events were defined as follows: Peripheral neuropathy, all subjects with an SPNS score  $\geq 2$ , or any SPNS score of one that resulted in a dose adjustment; Optic neuropathy > grade 2; other AEs  $\geq$  grade 3; and other < grade 3 events reported as SAEs at the investigators discretion (dizziness n=1 and reaction to psychotropic medications n=1).

†SAEs were defined as follows:

- Resulted in death (no deaths have occurred on study to date)
- Was life-threatening
- Required or prolonged hospitalization
- Resulted in persistent or significant disability
- Required intervention to prevent permanent impairment or damage

† dizziness (n=1), reaction to psychotropic medications ( n=1), colon cancer with metastasis (n=1), esophageal hemorrhage due to Mallory-Weiss Tear (n=1), hemoptysis (n=1), cataract (n=1) and diarrhea (n=1)

All adverse events were graded using the DAIDS Toxicity Tables, located at <http://rsc.tech-res.com/safetyandpharmacovigilance/gradingtables.aspx>.

Recurrent events in a single subject were only counted once.

**Supplemental Figure 3: Kaplan-Meier survival curves of type of adverse event and time since 2<sup>nd</sup> randomization, stratified by treatment arm**

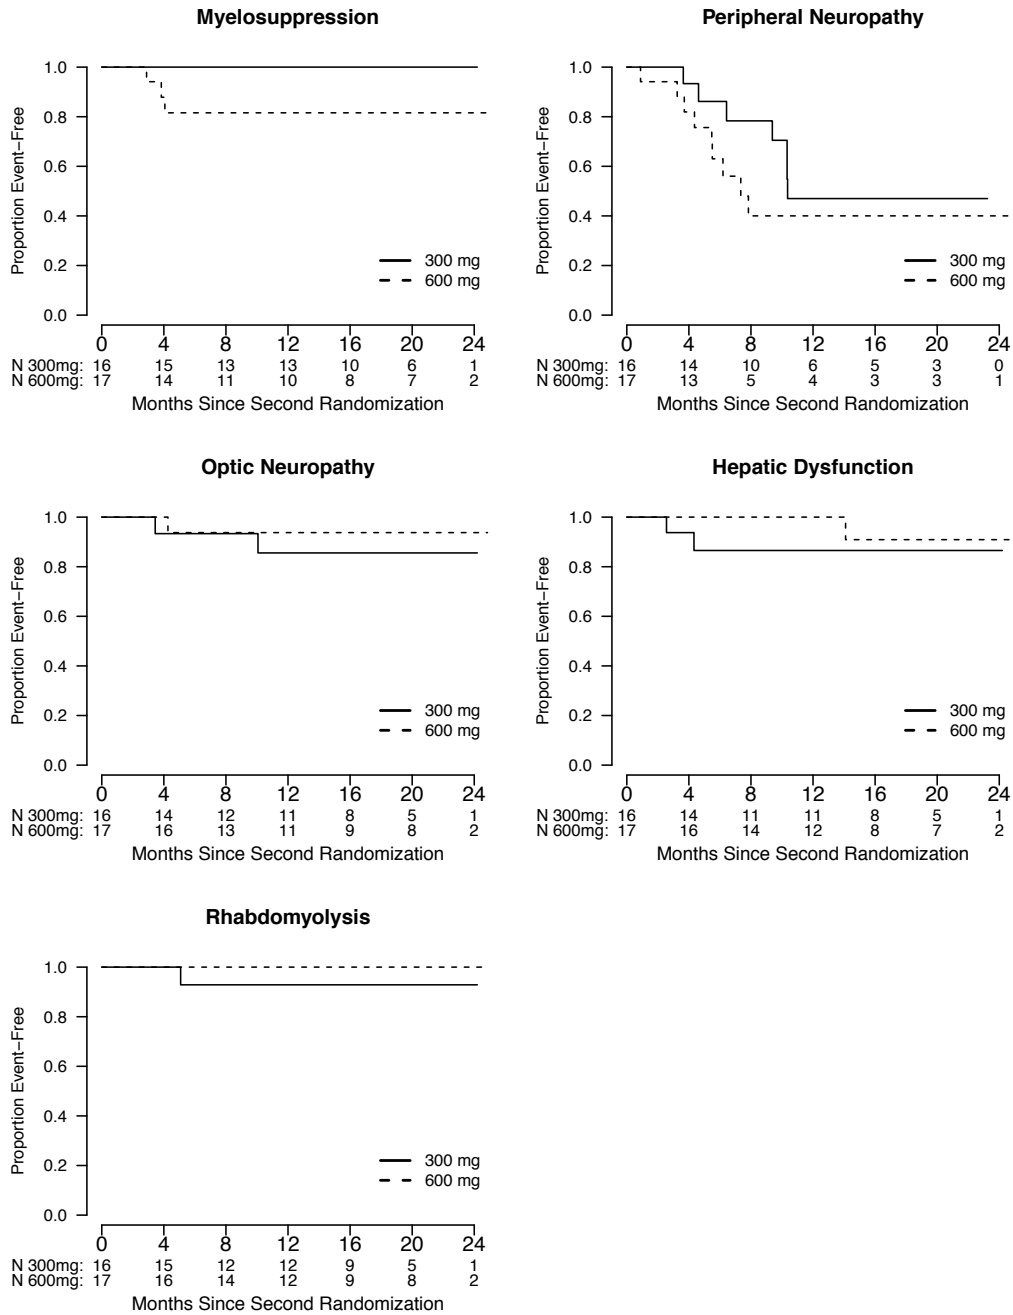

**Supplemental Table 3: Frequency of clinically significant adverse events possibly or probably related to linezolid**

| Event                    | 0-4 Mo |      |      |     |       |      | 4-8 Mo |      |      |     |      |      | 8-12 Mo |     |      |     |      |      |
|--------------------------|--------|------|------|-----|-------|------|--------|------|------|-----|------|------|---------|-----|------|-----|------|------|
|                          | N*     | PY†  | Rate | L0‡ | L300§ | L600 | N      | PY   | Rate | L0  | L300 | L600 | N       | PY  | Rate | L0  | L300 | L600 |
| Myelosuppression         | 5      | 12.0 | 0.42 | 0.0 | 1.3   | 10.7 | 1      | 10.1 | 0.10 | 0.0 | 6.8  | 3.3  | 0       | 8.4 | 0.00 | 0.4 | 6.7  | 0.9  |
| Peripheral Neuropathy    | 5      | 12.1 | 0.41 | 0.1 | 1.6   | 10.4 | 10     | 8.2  | 1.22 | 0.0 | 5.8  | 2.4  | 5       | 4.7 | 1.07 | 0.1 | 3.7  | 0.7  |
| Optic Neuropathy         | 1      | 12.5 | 0.08 | 0.1 | 1.7   | 10.7 | 2      | 10.7 | 0.19 | 0.0 | 7.4  | 3.3  | 3       | 8.0 | 0.38 | 0.0 | 6.5  | 1.5  |
| Hepatic Enzyme Elevation | 1      | 12.4 | 0.08 | 0.1 | 1.5   | 10.8 | 1      | 10.9 | 0.09 | 0.0 | 7.5  | 3.4  | 1       | 8.6 | 0.12 | 0.4 | 7.0  | 0.9  |
| Rhabdomyolysis           | 0      | 12.5 | 0.00 | 0.1 | 1.7   | 10.8 | 1      | 11.3 | 0.09 | 0.0 | 7.9  | 3.4  | 0       | 9.0 | 0.00 | 0.4 | 7.3  | 0.9  |

\*N, number of events observed during the specified time interval from linezolid start; †PY, Person-Years of study interval; ‡L0, Person-Years of subjects receiving no linezolid during the study interval; §L300, person-years of subjects receiving 300 mg linezolid during the study period; ||L600, person-years of subjects receiving 600 mg linezolid during the study period

**Supplemental Table 4: Linezolid stoppage and dose adjustments\***

| Subject ID | Stoppage period (days) | Reason                                         | Relationship to LZD | Dose adjustment         |
|------------|------------------------|------------------------------------------------|---------------------|-------------------------|
| 1          | 2                      | Hepatic enzyme elevation                       | Possibly related    | Re-challenge with 600mg |
| 2          | -                      | Anemia                                         | Probably related    | Permanently stopped     |
| 3          | 1                      | Joint pain                                     | Unrelated           | Re-challenge with 600mg |
|            | 18                     | Neutropenia                                    | Probably related    | De-escalation to 300mg  |
| 4          | 18                     | Peripheral neuropathy                          | Probably related    | Re-challenge with 300mg |
| 5          | 11                     | Peripheral neuropathy                          | Probably related    | De-escalation to 300mg  |
| 6          | -                      | Optic neuropathy                               | Possibly related    | Permanently stopped     |
| 7          | 21                     | Peripheral neuropathy                          | Probably related    | De-escalation to 300mg  |
| 8          | 5                      | Hepatic enzyme elevation                       | Possibly related    | Re-challenge with 300mg |
|            | 20                     | Rhabdomyolysis                                 | Possibly related    | Re-challenge with 300mg |
| 9          | 23                     | Hepatic enzyme elevation                       | Possibly related    | Re-challenge with 300mg |
| 10         | 17                     | Optic neuropathy                               | Probably related    | De-escalation to 300mg  |
| 11         | 34                     | Peripheral neuropathy                          | Probably related    | De-escalation to 300mg  |
| 12         | 22                     | Anemia                                         | Probably related    | De-escalation to 300mg  |
|            | 12                     | Peripheral neuropathy                          | Probably related    | Re-challenge with 300mg |
| 13         | 14                     | Peripheral neuropathy                          | Probably related    | De-escalation to 300mg  |
|            | 33                     | Optic neuropathy                               | Probably related    | Re-challenge with 300mg |
| 14         | 20                     | Anemia                                         | Probably related    | De-escalation to 300mg  |
| 15         | 21                     | Peripheral neuropathy                          | Probably related    | De-escalation to 300mg  |
| 16         | 8                      | Gastrointestinal bleeding                      | Unrelated           | Re-challenge with 600mg |
|            | 14                     | Peripheral neuropathy                          | Probably related    | De-escalation to 300mg  |
| 17         | 25                     | Neurologic reaction to psychological medicines | Unlikely related    | Re-challenge with 600mg |
| 18         | 10                     | Peripheral neuropathy                          | Probably related    | De-escalation to 300mg  |
|            | 13                     | Pneumonia                                      | Unlikely related    | Re-challenge with 300mg |
| 19         | 28                     | Optic neuropathy                               | Possibly related    | Re-challenge with 300mg |
| 20         | 16                     | Peripheral neuropathy                          | Probably related    | De-escalation to 300mg  |
| 21         | 25                     | Optic neuropathy                               | Possibly related    | De-escalation to 300mg  |
| 22         | 26                     | Optic neuropathy                               | Probably related    | Re-challenge with 300mg |

|    |    |                           |                  |                         |
|----|----|---------------------------|------------------|-------------------------|
|    | -  | Optic neuropathy          | Probably related | Permanently stopped     |
| 23 | 25 | Anemia                    | Probably related | De-escalation to 300mg  |
| 24 | 26 | Peripheral neuropathy     | Possibly related | De-escalation to 300mg  |
|    | 14 | Peripheral neuropathy     | Possibly related | Re-challenge with 300mg |
| 25 | 11 | Anemia                    | Probably related | De-escalation to 300mg  |
|    | 3  | Total bilirubin elevation | Possibly related | Re-challenge with 300mg |

\*For this table 3 cases of brief drug stoppages for personal reasons (unrelated to the study) were excluded

**Supplemental Figure 4: Current status of study subjects**

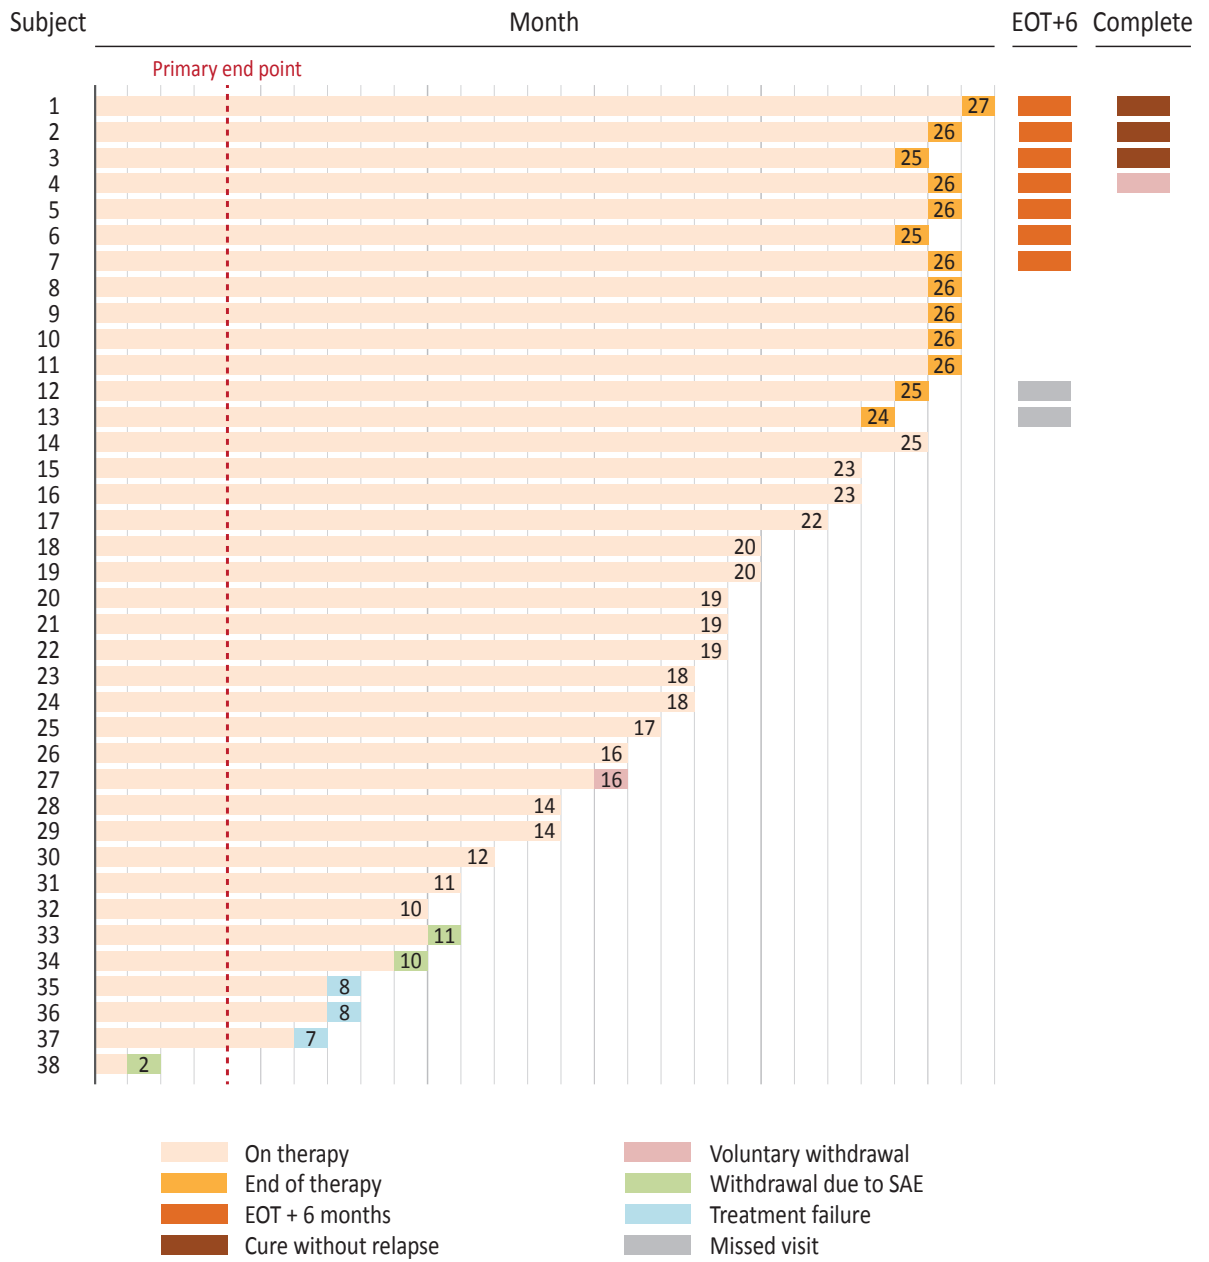



## Supplemental Material 2: Subjective Peripheral Neuropathy Score (SPNS)

1. Instruction for recording; ask the patient to rate the severity of each symptom (a-f) on a scale of 1 (mild)-10 (most severe). Enter the score for each symptom in the column marked Presence/Severity. If symptom has been present in the past, but not since the last visit, enter "00"/Currently Absent. If the symptom has never been present, enter "11"/Always Been Normal.

| Always been normal<br>11 | Currently absent<br>00 | Mild ..... Severe |    |    |    |    |    |    |    |    |    |
|--------------------------|------------------------|-------------------|----|----|----|----|----|----|----|----|----|
|                          |                        | 01                | 02 | 03 | 04 | 05 | 06 | 07 | 08 | 09 | 10 |

2. Symptom(s) Presence/Severity
  - a. Pain, aching or burning in hands, arms ..... \_\_\_\_\_
  - b. Pain, aching or burning in feet, legs ..... \_\_\_\_\_
  - c. "Pins and needles" in hands, arms ..... \_\_\_\_\_
  - d. "Pins and needles" in feet, legs ..... \_\_\_\_\_
  - e. Numbness (lack of feeling) in hands, arms ..... \_\_\_\_\_
  - f. Numbness (lack of feeling) in feet, legs ..... \_\_\_\_\_
3. Instructions for grading subjective patient-elicited symptoms:  
Use highest severity score recorded in (a-f) above to obtain a subjective peripheral neuropathy grade :
 

|                            |                       |
|----------------------------|-----------------------|
| Presence/Severity Score of | 01-03 = Grade of 1    |
|                            | 04-06 = Grade of 2    |
|                            | 07-10 = Grade of 3    |
|                            | 11 or 00 = Grade of 0 |
4. Subjective peripheral neuropathy grade?..... \_\_\_\_\_
